# Supplementary material for: Defects tailoring IrO2@TiN1+x nano-heterojunctions for superior water oxidation activity and stability
Source: Royal Society of Chemistry journal article supplement (doi:10.1039/d1qm00845e), 2021-01-01
Supplement: d1qm00845e1.pdf [file d1qm00845e1.pdf]

Supporting Information for

**Defects tailoring IrO<sub>2</sub>@TiN<sub>1+x</sub> nano-heterojunction for superior  
water oxidation activity and stability**

*Sen Wang,<sup>a</sup> Hong Lv,<sup>\*a</sup> Songhu Bi,<sup>a</sup> Tianqi Li,<sup>a</sup> Yongwen Sun,<sup>a</sup> Wenxuan Ji,<sup>a</sup> Cong*

*Feng,<sup>b</sup> Cunman Zhang<sup>a</sup>*

*<sup>a</sup> Institute of Fuel Cell Composite Power Sources, Clean Energy Automotive  
Engineering Center, School of Automotive Studies, Tongji University, Shanghai  
201804, P. R. China.*

*<sup>b</sup> School of Materials Science and Engineering, Tongji University, Shanghai, 201804,  
P. R. China.*

*\*Corresponding Authors*

*Email: lvhong@tongji.edu.cn. (Hong Lv)*

*Telephone Number: +86(21) 69583850*

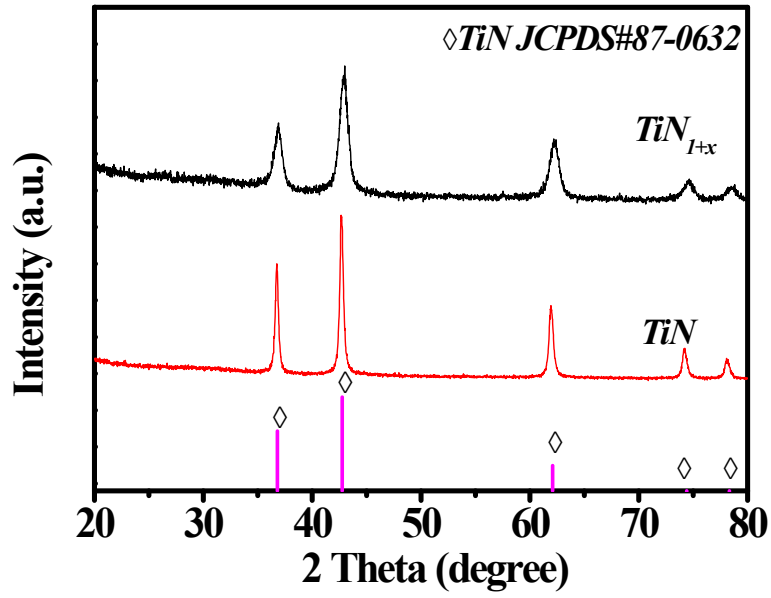

Fig. S1 (a) XRD patterns of  $\text{TiN}$  and  $\text{TiN}_{1+x}$ .

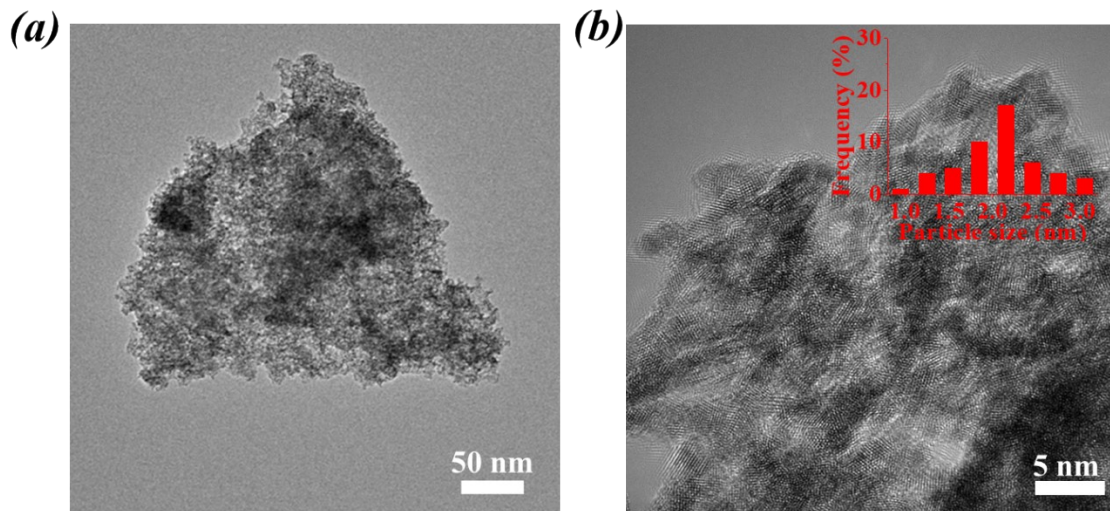

Fig. S2 (a) TEM and (b) HRTEM images of  $\text{IrO}_2$ .

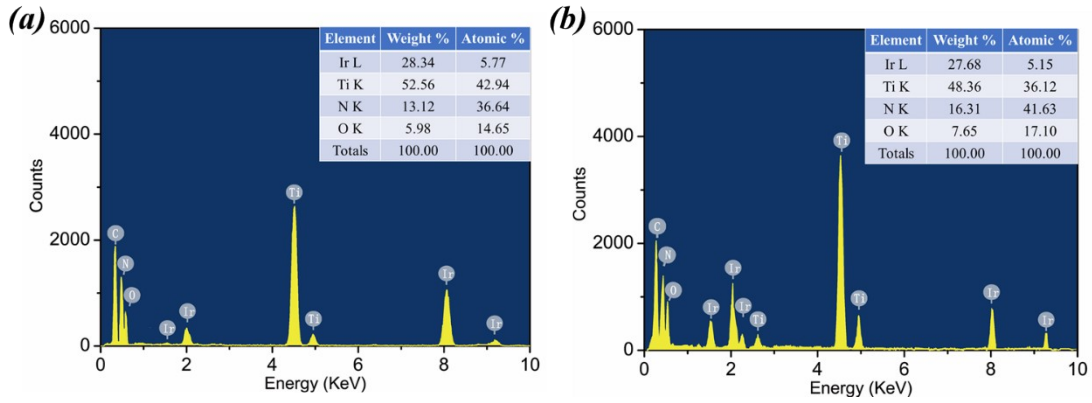

Fig. S3 EDS spectrum and the corresponding element contents of (a) IrO<sub>2</sub>/TiN and (b) IrO<sub>2</sub>/TiN<sub>1+x</sub>.

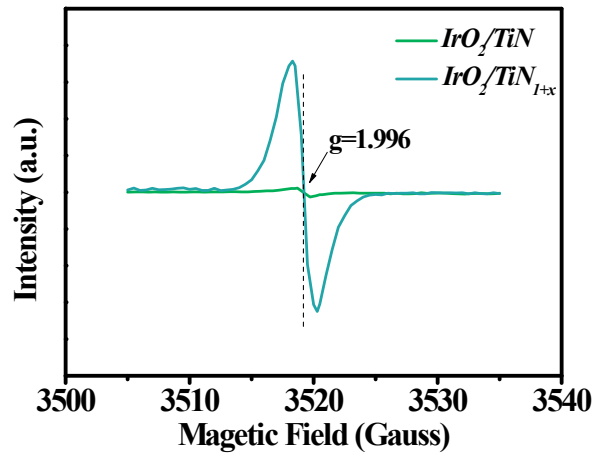

Fig. S4 EPR spectra of IrO<sub>2</sub>/TiN and IrO<sub>2</sub>/TiN<sub>1+x</sub>.

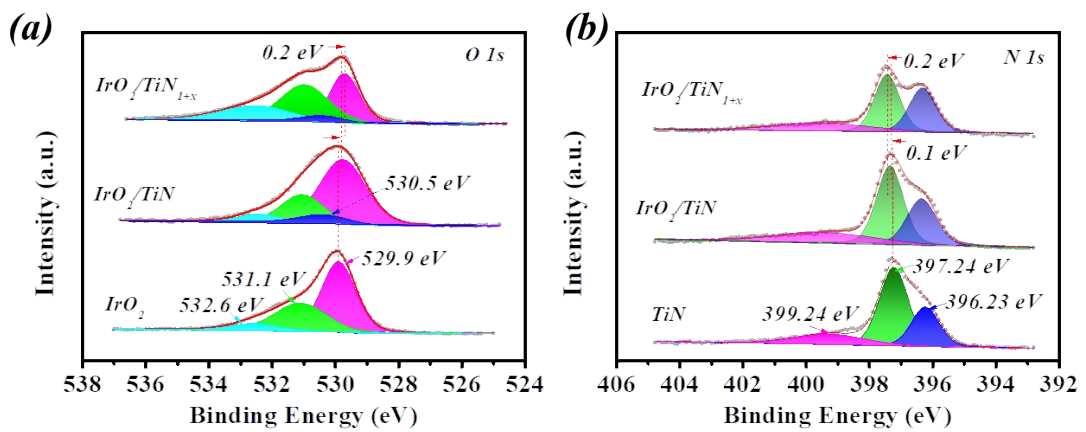

Fig. S5 High-resolution of (a) Ir 4f, (b) Ti 1 s, (c) O1s and (d) N 1 s XPS spectra.

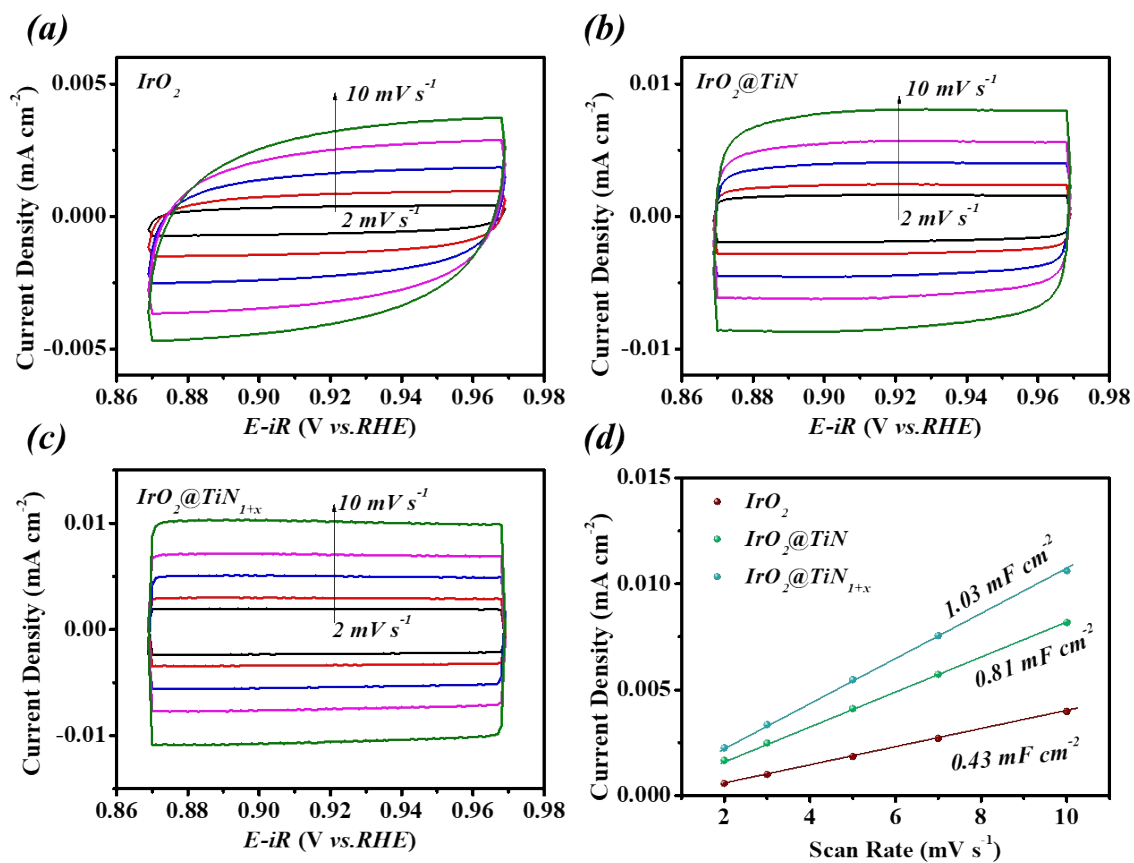

Fig. S6 CV curves of (a)  $IrO_2$ , (b)  $IrO_2@TiN$ , and (c)  $IrO_2@TiN_{1+x}$  measured within the range of 0.87–0.97 V vs. RHE, (d) corresponding plots of the current densities at 0.919 V vs. RHE with the different scan rates.

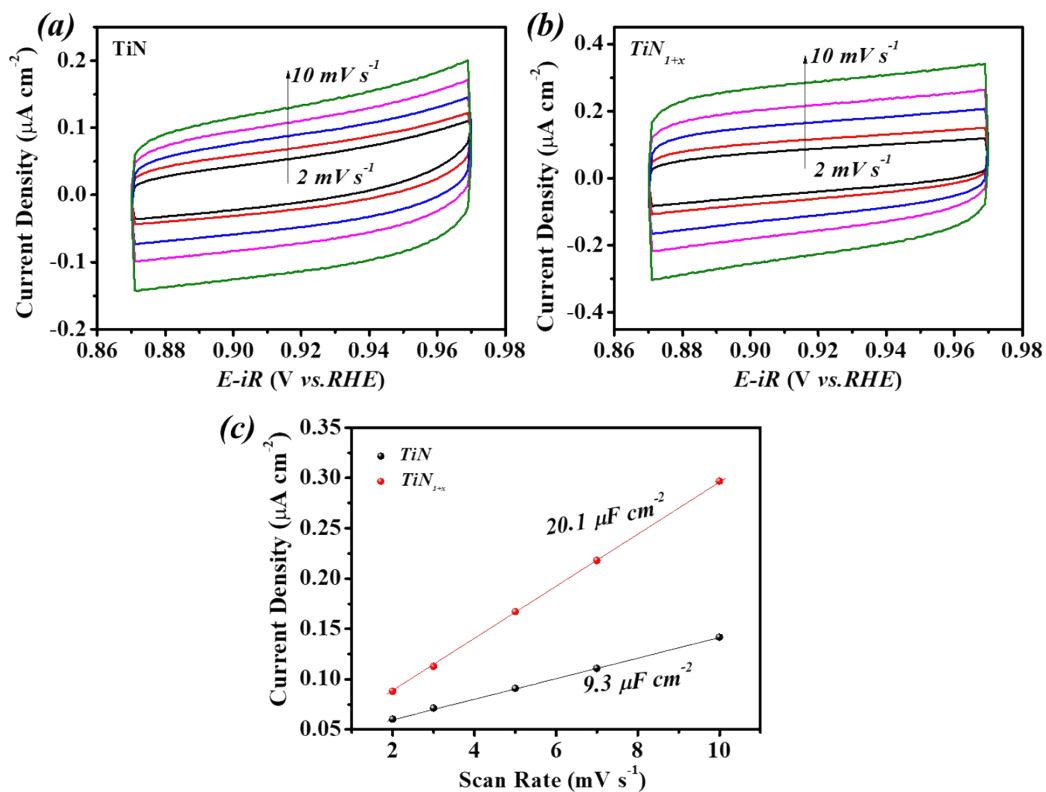

Fig. S7 CV curves of (a) TiN, (b) TiN<sub>1+x</sub> measured within the range of 0.87–0.97 V vs. RHE, (c) corresponding plots of the current densities at 0.919 V vs. RHE with the different scan rates.

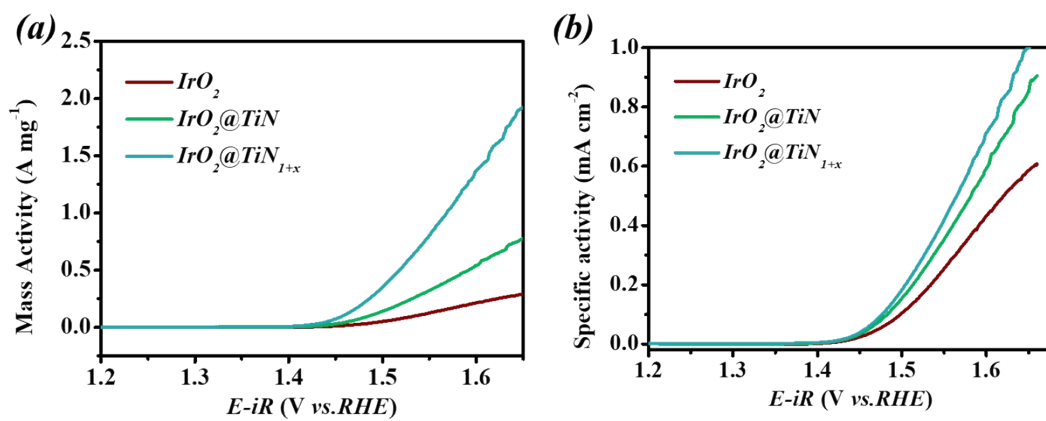

Fig. S8 (a) Mass activity and (b) specific activity of the prepared samples.

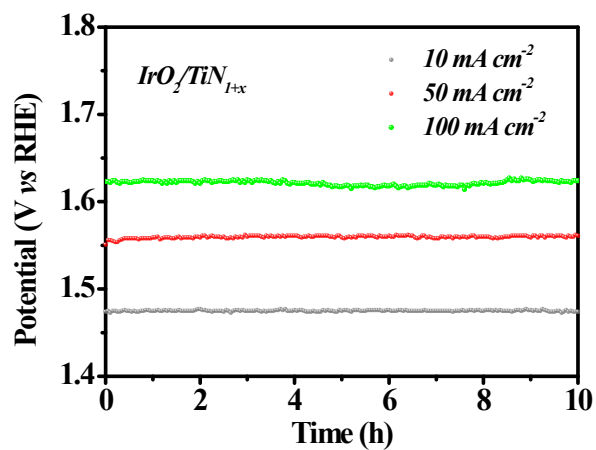

Fig. S9  $\text{IrO}_2@\text{TiN}_{1+x}$  at the current densities of 10, 50, 100 mA cm<sup>-2</sup> for 10 h.

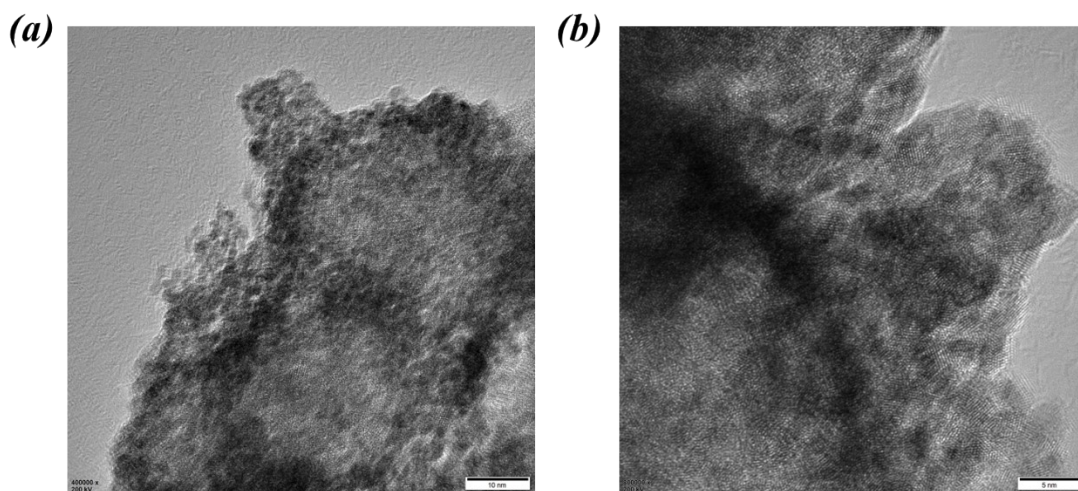

Fig. S10 (a) TEM and (b) HRTEM of  $\text{IrO}_2@\text{TiN}_{1+x}$  after 100 h stability test.

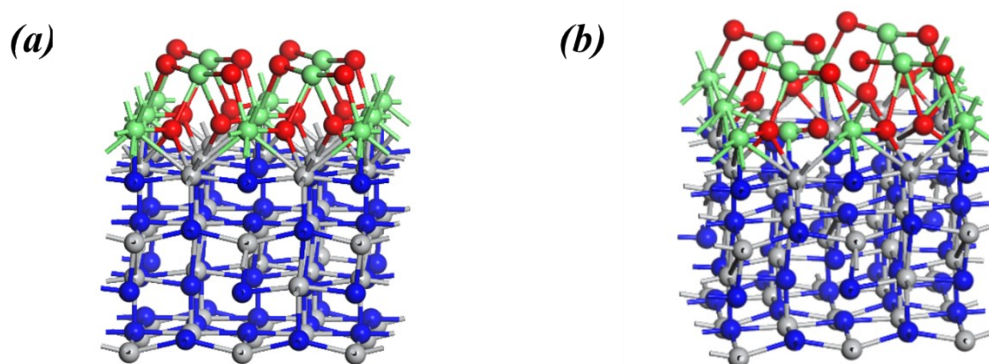

Fig. S11 The optimized models of (a)  $\text{IrO}_2@\text{TiN}$  and (b)  $\text{IrO}_2@\text{TiN}_{1+x}$ .
